# Supplementary material for: Two New Aluminoborates with 3D Porous-Layered Frameworks
Source: MDPI journal article supplement (doi:10.3390/molecules28114387), 2023-05-27
Supplement: s1 [file s1]

# Syntheses and structures of two new aluminoborates with 3D porous-layered frameworks

Chen Wang, Juan Chen, Chongan Chen, Zhenwen Wang and Guoyu Yang \*

Figure S1. Composition of 13-MR (a) and 8-MR (b) windows in **1**.

Figure S2. The coordination of metal cations in **1**.

Figure S3. The coordination of metal cations in **2**.

Figure S4. Metal-oxygen chain in **2**.

Figure S5. The 2D monolayers in **1** (a), **3** (b), **4** (c) and **5** (d), respectively.

Figure S6. The porous-layered structures in **3** (a), **4** (b) and **5** (c), respectively.

Figure S7. PXRD of **1** (a) and **2** (b).

Figure S8. IR spectra of **1** (a) and **2** (b).

Figure S9. TG-DSC curves of **1** (a) and **2** (b).

Figure S10. The morphology of compounds **1** and **2**, respectively.

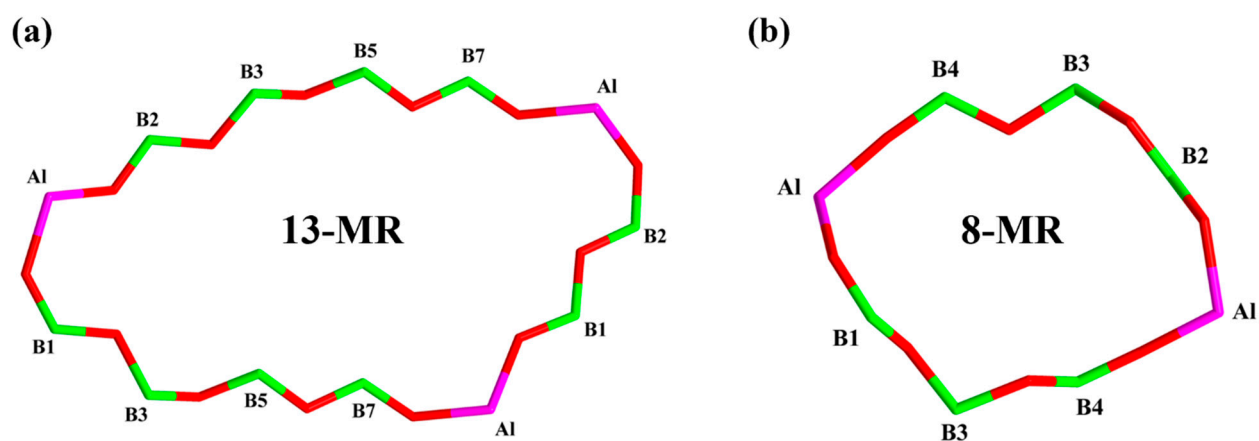

Figure S1. Composition of 13-MR (a) and 8-MR (b) windows in 1.

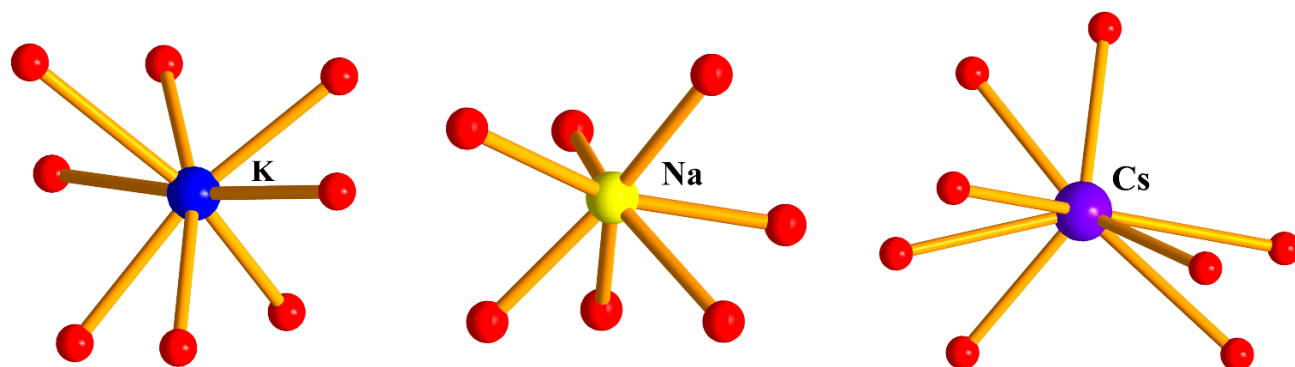

Figure S2. The coordination of metal cations in 1.

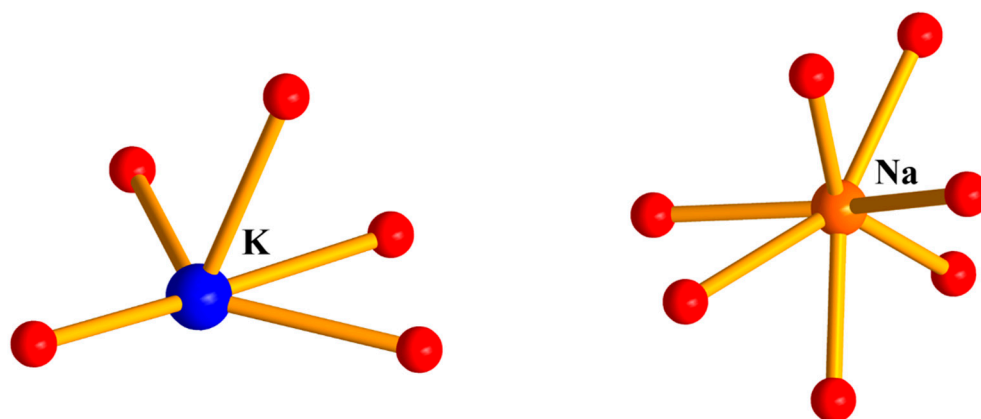

Figure S3. The coordination of metal cations in 2.

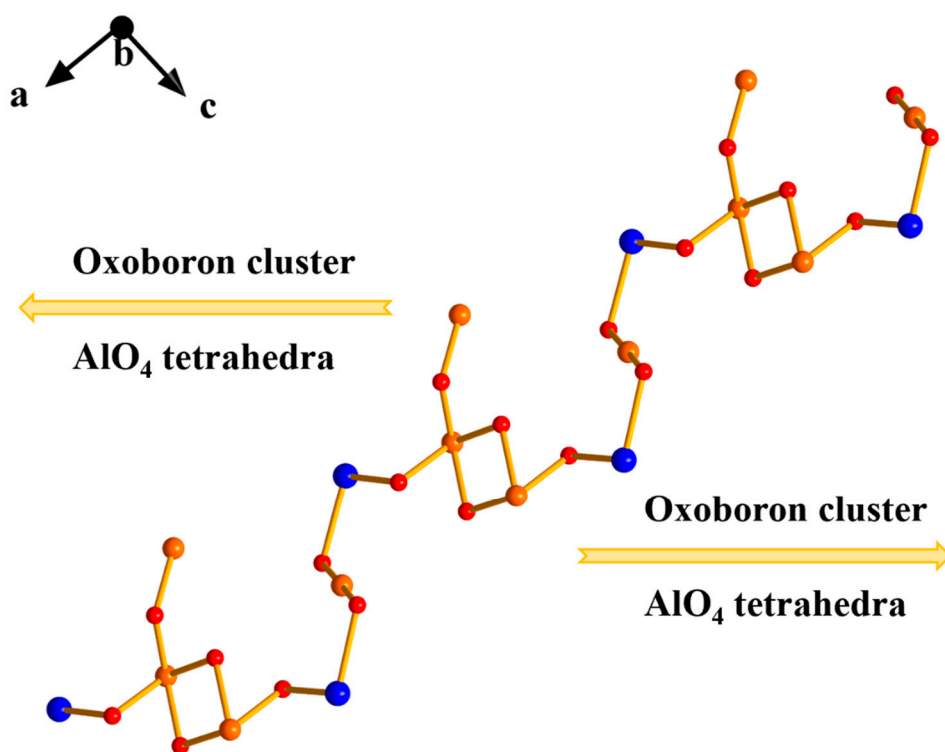

Figure S4. Metal-oxygen chain in 2.

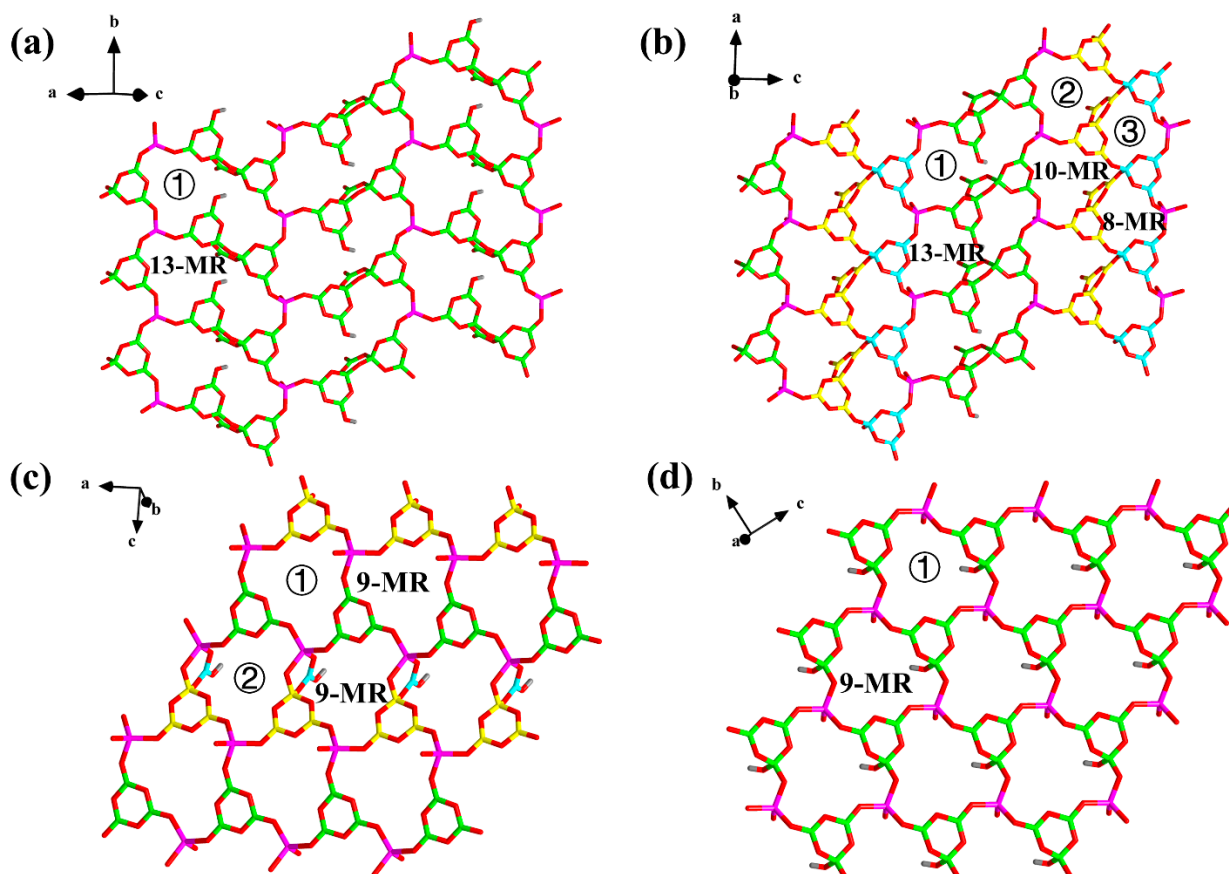

Figure S5. The 2D monolayers in 1 (a), 3 (b), 4 (c) and 5 (d), respectively.

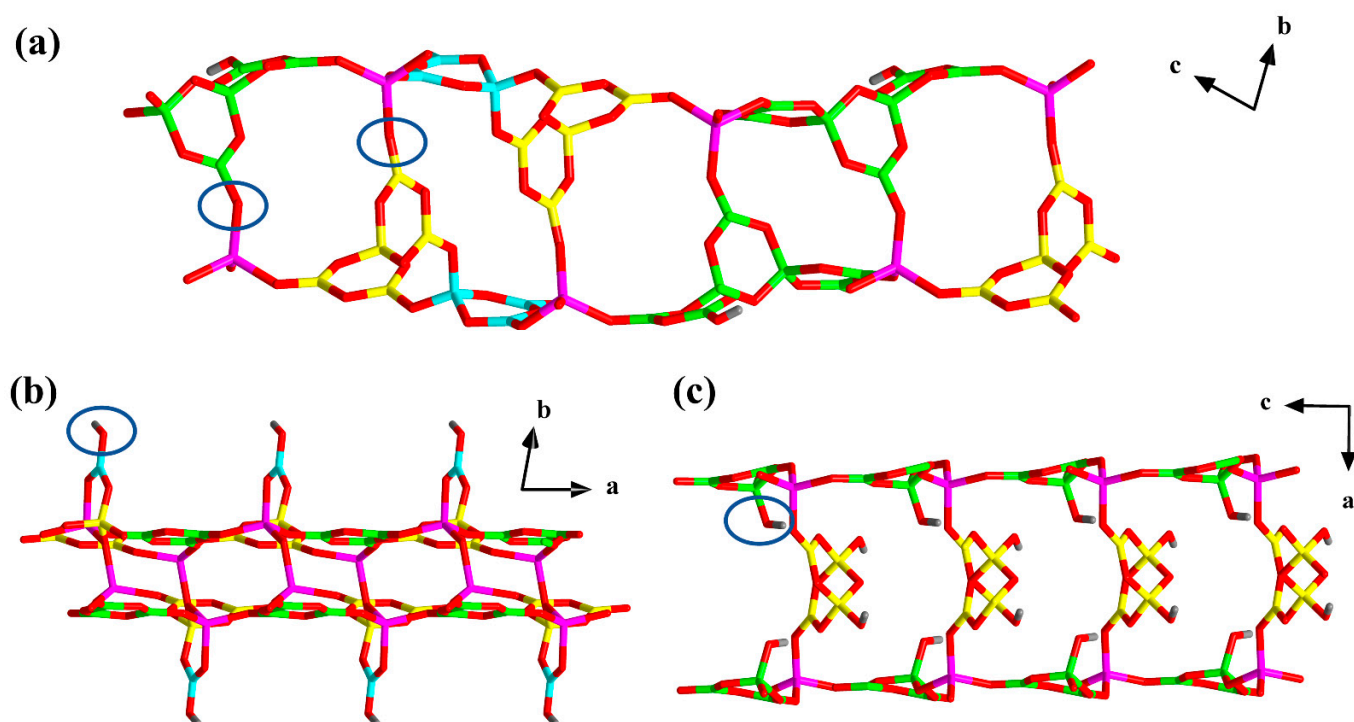

Figure S6. The porous-layered structures in 3 (a), 4 (b) and 5 (c), respectively.

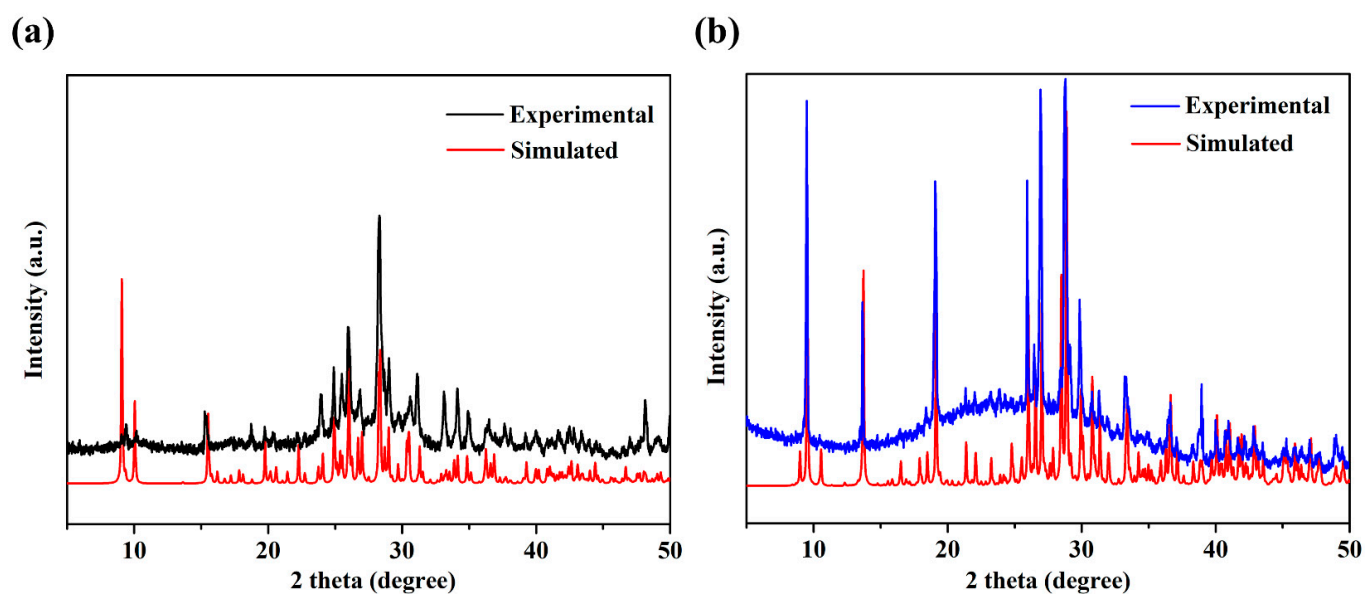

Figure S7. PXRD of 1 (a) and 2 (b).

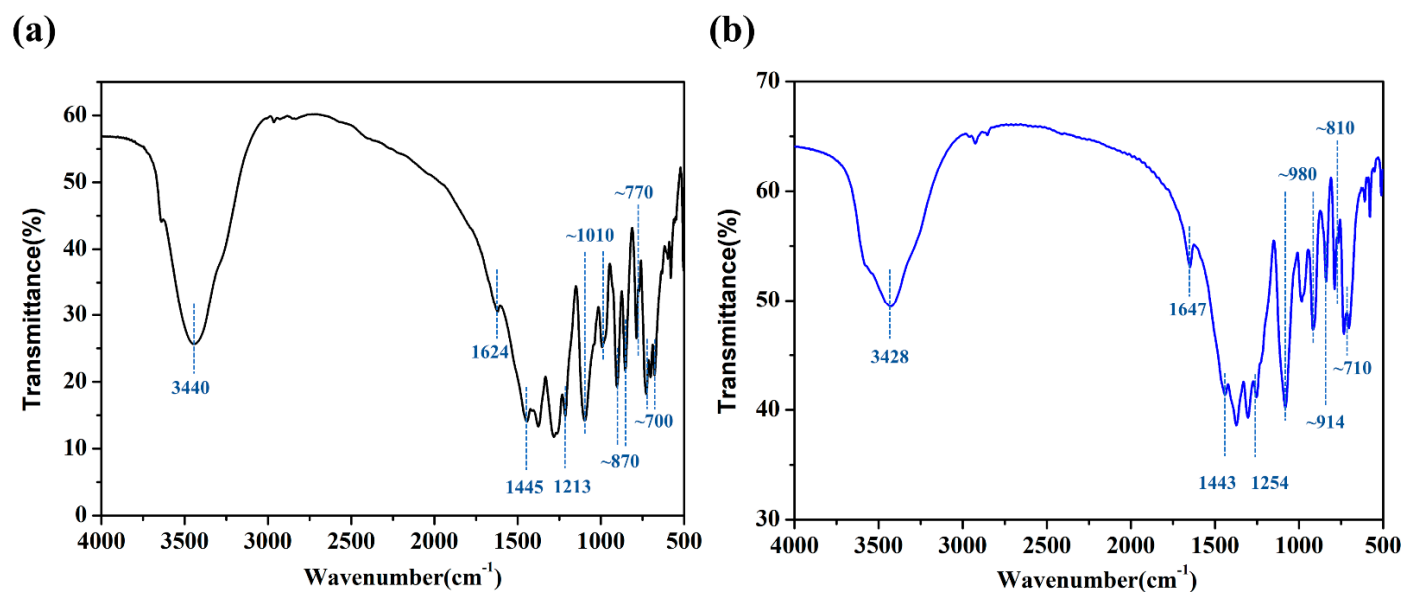

Figure S8. IR spectra of 1 (a) and 2 (b).

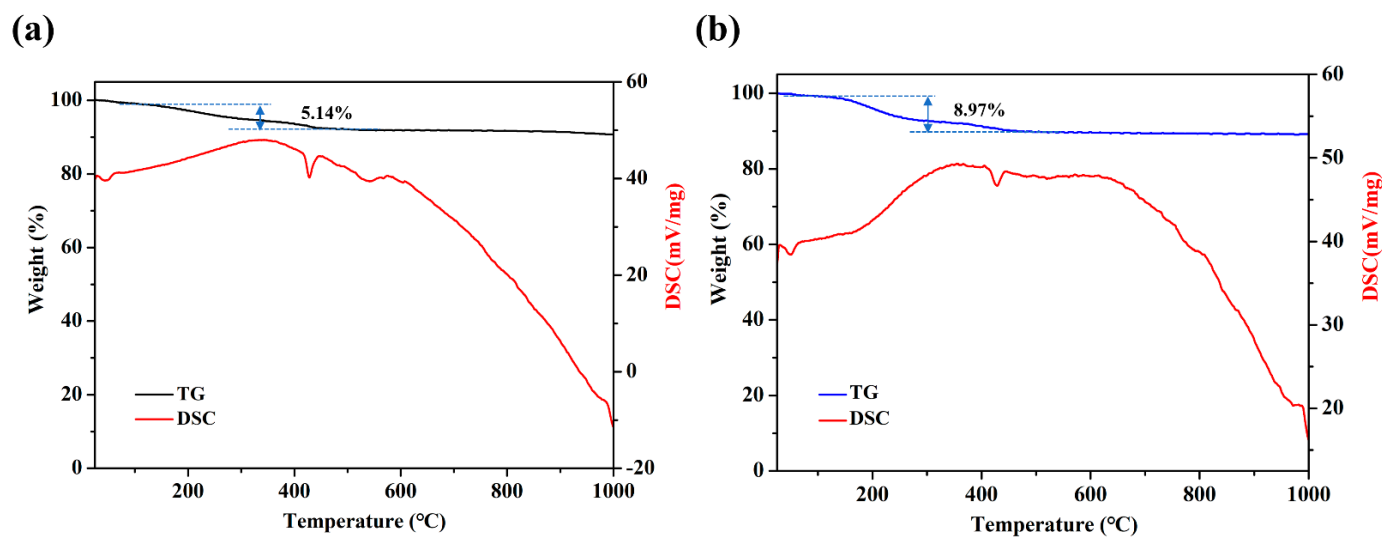

Figure S9. TG-DSC curves of 1 (a) and 2 (b).

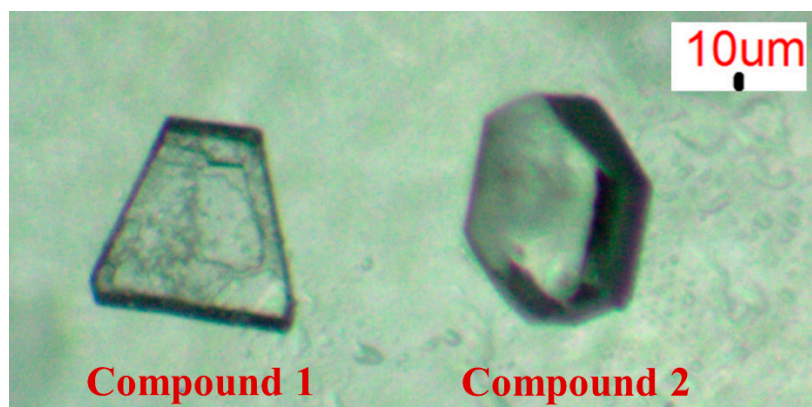

Figure S10. The morphology of compounds 1 and 2, respectively.
